# Supplementary material
Source: Springer Nature journal article supplement (https://www.springermedizin.de/resource/supplementary/12985_2013_2258_MOESM3_ESM.pdf/9606386)

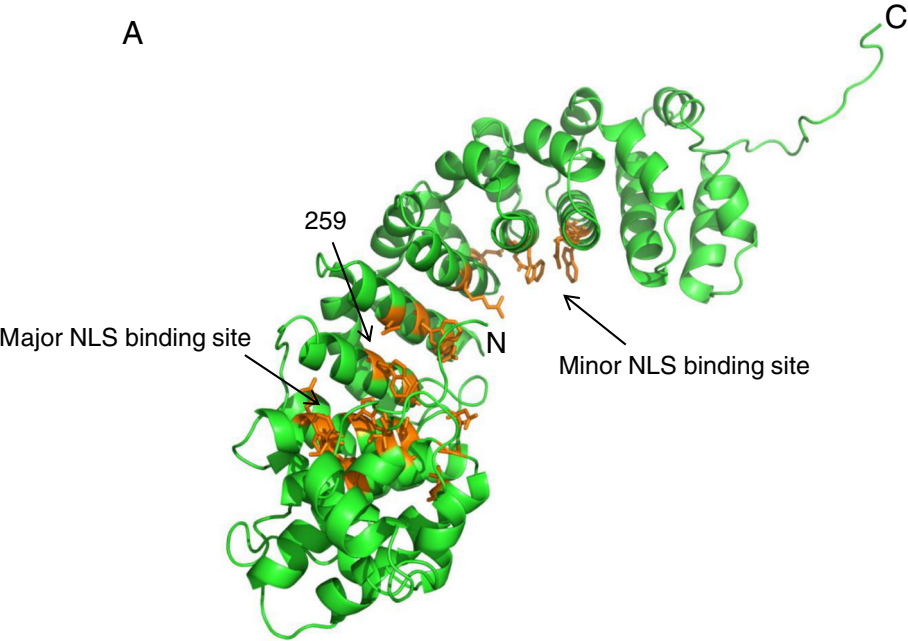

**B**

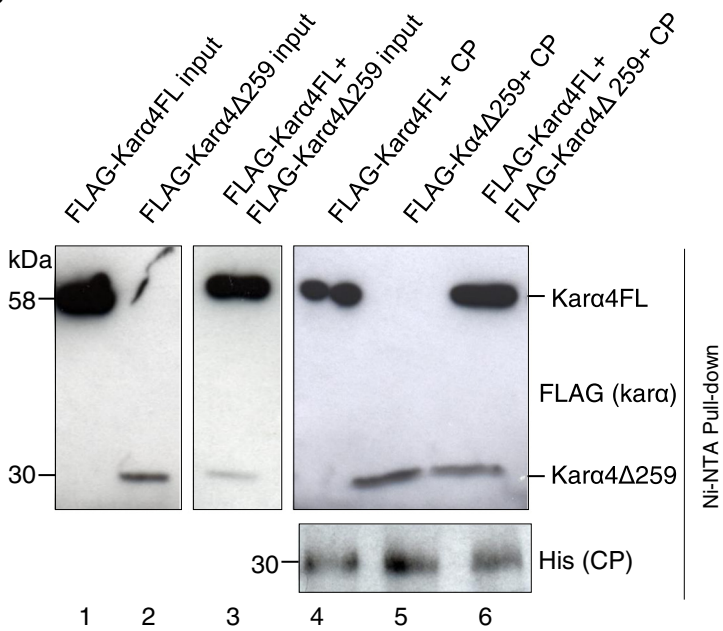

Supplement: MOESM3 [file 9606386]
